# Supplementary figures and images for: Sustainable innovations in digital twin technology: a systematic review about energy efficiency and indoor environment quality in built environment
Source: Frontiers journal article supplement (doi:10.3389/fbuil.2025.1523464), 2025-03-13

Supplementary Material

# Supplementary Figures

## Figure 1

**Graphical abstract:**

**
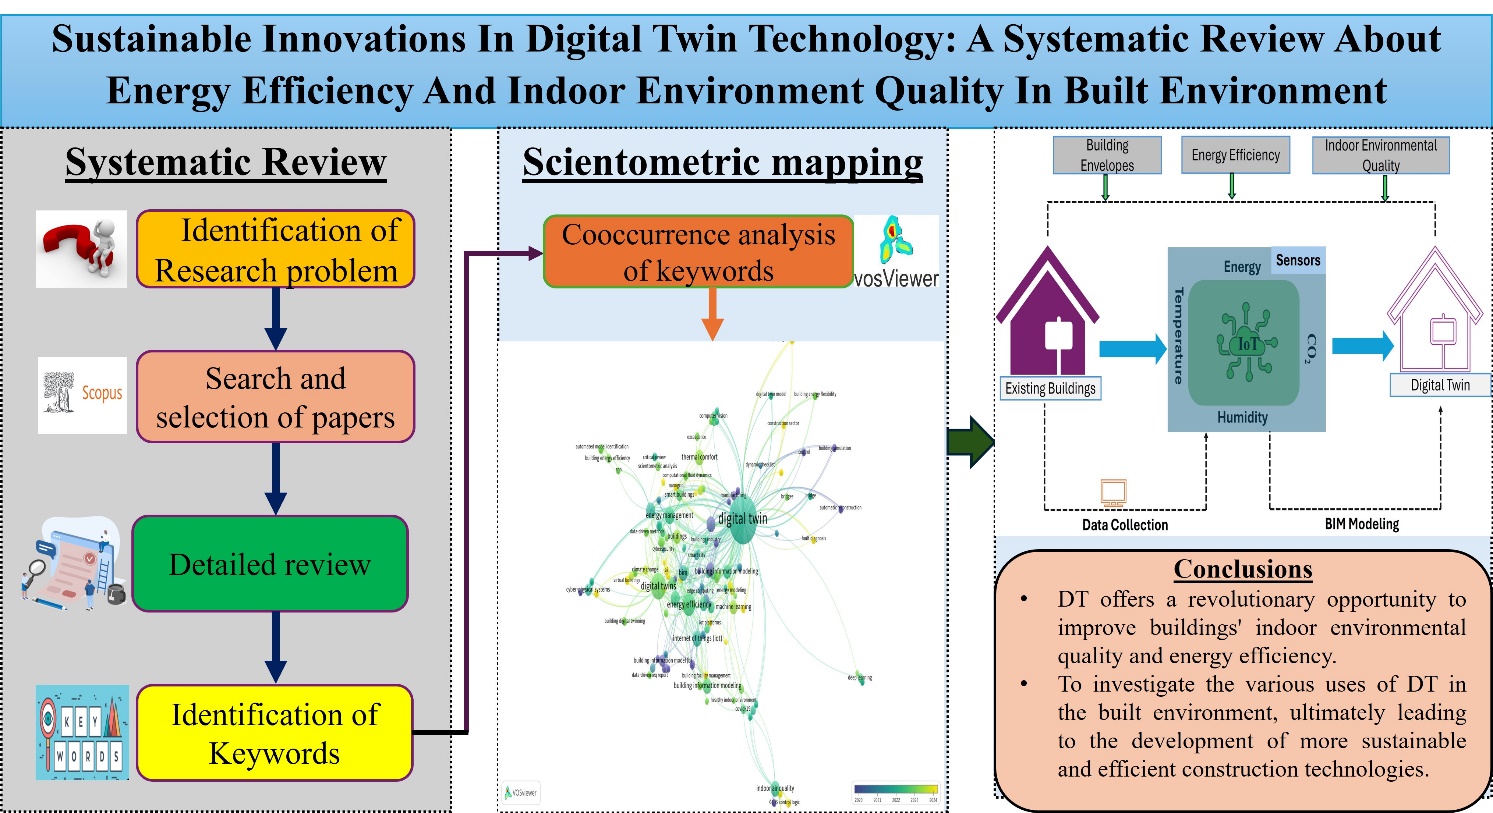
**

Supplement: Supplementary_file_1.docx [file Supplementary_file_1.docx]
